# Supplementary material
Source: HighWire-hosted journal article supplement (https://fg.bmj.com/highwire/filestream/145787/field_highwire_adjunct_files/2/flgastro-2023-102428supp003_data_supplement.pdf)

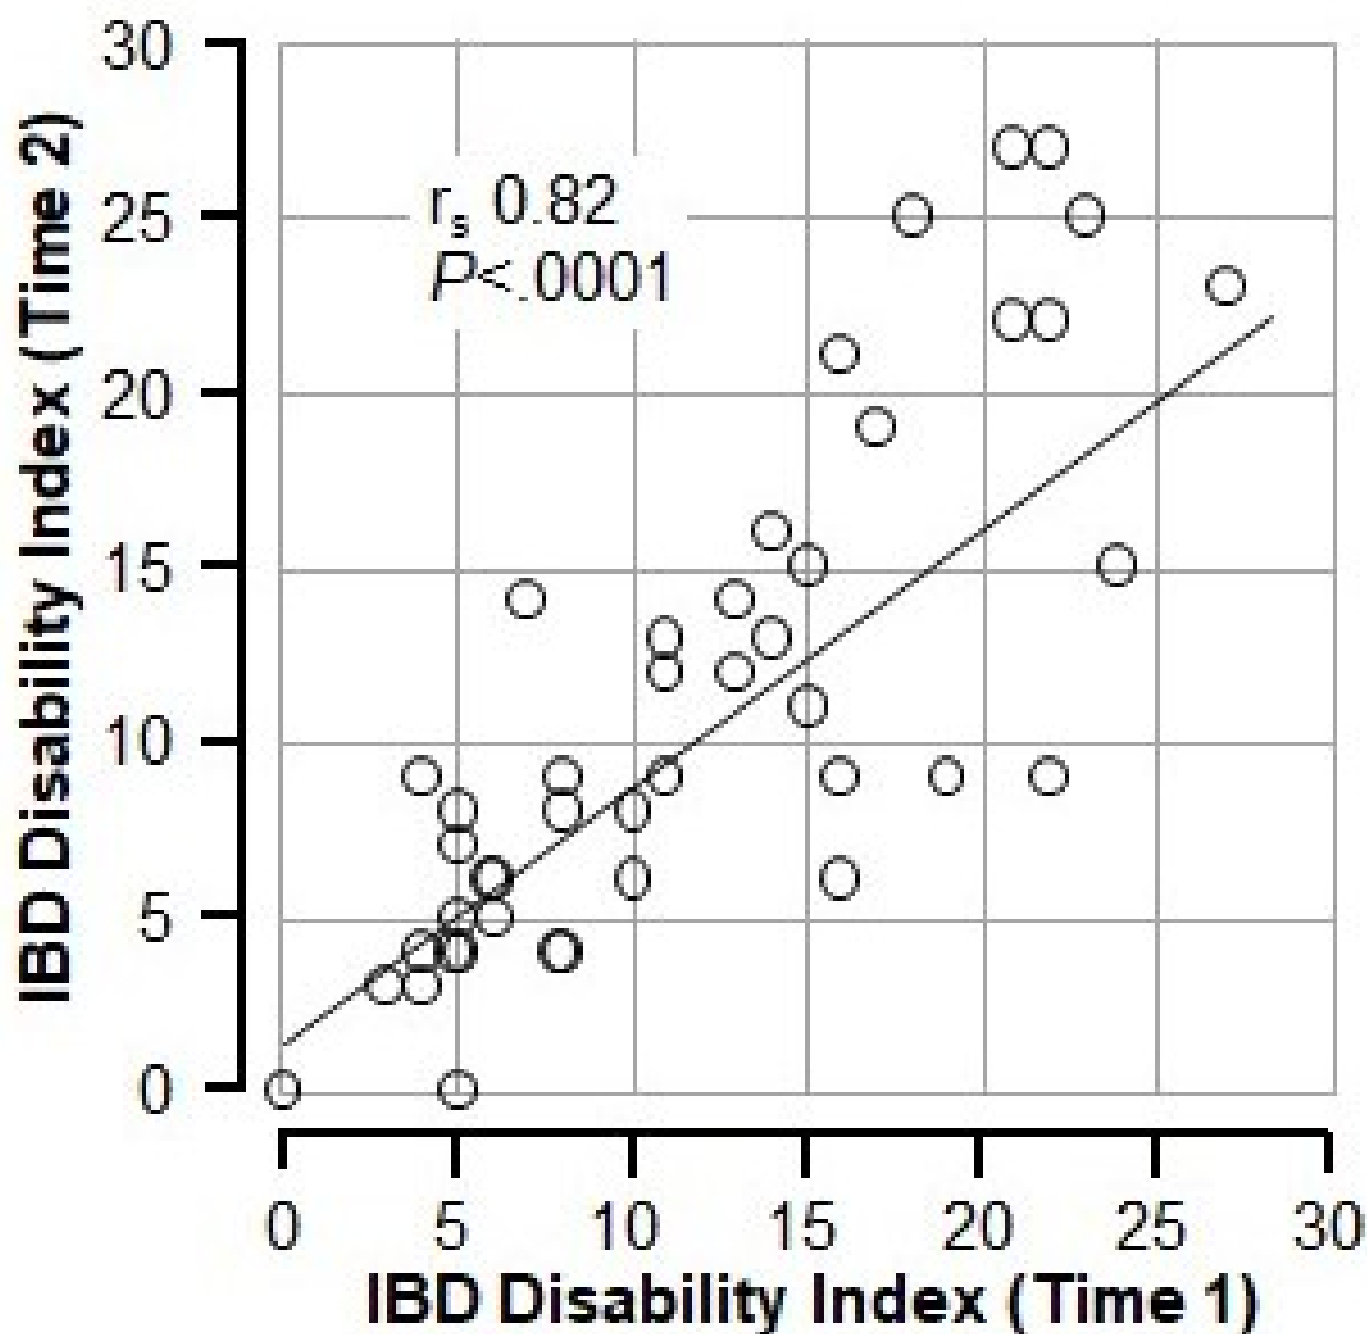

Supplement: flgastro-2023-102428supp003_data_supplement.pdf [file flgastro-2023-102428supp003_data_supplement.pdf]
